# Supplementary material
Source: Springer Nature journal article supplement (https://www.springermedizin.de/resource/supplementary/12913_2014_3202_MOESM4_ESM.pdf/9532680)

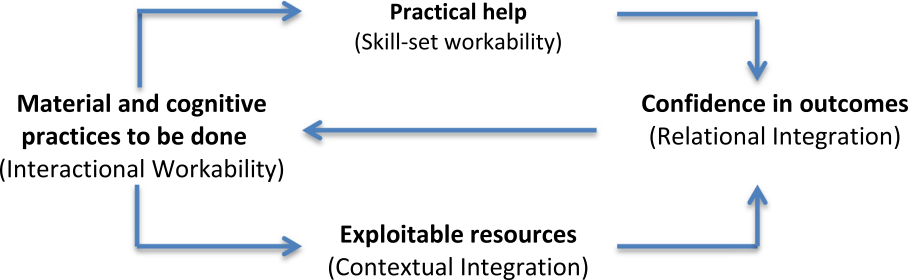

Supplement: MOESM4 [file 9532680]
